# Supplementary material
Source: publisher site journal article supplement (https://www.dovepress.com/article/608168)
Supplement: Supplementary file 1 [file Supplementary%20material.pdf]

**Supplementary Table 1. Univariate logistic regression analysis for LAT/SEC.**

| Variables                                    | LAT/SEC              |         |
|----------------------------------------------|----------------------|---------|
|                                              | OR (95% CI)          | P value |
| Demographics                                 |                      |         |
| Age                                          | 1.039 (1.012, 1.068) | 0.006   |
| Gender                                       |                      |         |
| Female                                       | 1 (Reference)        |         |
| Male                                         | 1.033 (0.646, 1.676) | 0.894   |
| Smoking status                               | 1.419 (0.857, 2.309) | 0.165   |
| Alcohol consumption                          | 1.050 (0.571, 1.845) | 0.869   |
| Paroxysmal AF                                | 1.511 (0.954, 2.393) | 0.078   |
| SBP                                          | 1.010 (0.996, 1.023) | 0.162   |
| DBP                                          | 1.015 (0.997, 1.033) | 0.105   |
| BMI                                          | 0.969 (0.900, 1.042) | 0.398   |
| CHA <sub>2</sub> DS <sub>2</sub> -VASc score | 1.643 (1.415, 1.922) | <0.001  |
| Hypertension                                 | 1.882 (1.168, 3.099) | 0.011   |
| Diabetes mellitus                            | 1.743 (1.053, 2.841) | 0.028   |
| Coronary heart disease                       | 1.499 (0.874, 2.509) | 0.131   |
| Heart failure                                | 1.742 (1.034, 2.880) | 0.033   |
| Stroke/TIA                                   | 1.064 (0.302, 2.937) | 0.913   |
| RBC                                          | 1.111 (0.708, 1.751) | 0.647   |
| WBC                                          | 1.096 (0.955, 1.255) | 0.187   |
| PLT                                          | 0.999 (0.994, 1.003) | 0.623   |
| Neutrophil                                   | 1.111 (0.708, 1.751) | 0.647   |
| Lymphocyte                                   | 0.838 (0.578, 1.202) | 0.623   |
| Monocyte                                     | 0.338 (0.063, 1.645) | 0.192   |
| Hb                                           | 1.000 (0.986, 1.015) | 0.963   |
| D-dimer                                      | 1.156 (0.802, 1.581) | 0.375   |
| ALT                                          | 1.009 (0.998, 1.020) | 0.087   |
| AST                                          | 1.024 (1.008, 1.041) | 0.003   |
| Creatinine                                   | 1.016 (1.002, 1.031) | 0.087   |
| TC                                           | 0.898 (0.715, 1.123) | 0.349   |
| TG                                           | 0.985 (0.736, 1.264) | 0.911   |
| LDL-C                                        | 0.937 (0.679, 1.287) | 0.692   |
| HDL-C                                        | 0.352 (0.144, 0.832) | 0.020   |

|                   |                      |        |
|-------------------|----------------------|--------|
| FPG               | 1.068 (0.962, 1.176) | 0.190  |
| Antiplatelets     | 2.153 (1.137, 3.934) | 0.015  |
| Anticoagulants    | 0.492 (0.303, 0.810) | 0.005  |
| Statins           | 1.507 (0.950, 2.417) | 0.084  |
| $\beta$ -blockers | 1.014 (0.400, 2.245) | 0.974  |
| LVEF              | 0.002 (0.000, 0.026) | <0.001 |
| LAD               | 1.106 (1.056, 1.160) | <0.001 |
| LVEDD             | 1.065 (1.020, 1.112) | 0.004  |
| EDT               | 1.000 (0.994, 1.005) | 0.895  |

Abbreviations: OR, odds ratio; CI, confidence intervals; AF, atrial fibrillation; SBP, systolic blood pressure; DBP, diastolic blood pressure; BMI, body mass index; TIA, transient ischemic attack; WBC, white blood cells; RBC, red blood cells; PLT, platelet count; Hb, hemoglobin; ALT, alanine aminotransferase; AST, aspartate aminotransferase; TC, total cholesterol; TG, triglyceride; LDL-C, low-density lipoprotein cholesterol; HDL-C, high-density lipoprotein cholesterol; FPG, fasting plasma glucose; LVEF, left ventricular ejection fraction; LAD, left atrial diameter; LVEDD, left ventricular end-diastolic dimension; EDT, E wave deceleration time.

**Supplementary Table 2. VIFs and tolerance for covariates in logistic regression models of UAR and LAT/SEC.**

| Variables      | Multicollinearity analysis |           |
|----------------|----------------------------|-----------|
|                | VIF                        | Tolerance |
| Age            | 1.259                      | 0.794     |
| Gender         | 1.790                      | 0.559     |
| BMI            | 1.176                      | 0.850     |
| Smoking status | 1.207                      | 0.828     |
| Hypertension   | 1.167                      | 0.857     |
| DM             | 1.182                      | 0.846     |
| HF             | 1.462                      | 0.684     |
| CHD            | 1.131                      | 0.884     |
| Stroke/TIA     | 1.068                      | 0.936     |
| Paroxysmal AF  | 1.058                      | 0.945     |
| WBC            | 1.294                      | 0.773     |
| PLT            | 1.308                      | 0.765     |
| D-dimer        | 1.163                      | 0.859     |
| ALT            | 3.097                      | 0.323     |

|                |       |       |
|----------------|-------|-------|
| AST            | 3.202 | 0.312 |
| Creatinine     | 1.547 | 0.646 |
| HDL-C          | 1.245 | 0.804 |
| LDL-C          | 1.205 | 0.830 |
| LAD            | 1.279 | 0.782 |
| LVEF           | 1.703 | 0.587 |
| Anticoagulants | 1.883 | 0.531 |
| Antiplatelets  | 1.893 | 0.528 |

Abbreviations: VIF, variance inflation factor; UAR, uric acid-to-albumin ratio; LAT, left atrial thrombus; SEC, spontaneous echo contrast; DM, diabetes mellitus; HF, heart failure; CHD, coronary heart disease; TIA, transient ischemic attack; AF, atrial fibrillation; WBC, white blood cells; PLT, platelet count; ALT, alanine aminotransferase; AST, aspartate aminotransferase; HDL-C, high-density lipoprotein cholesterol; LDL-C, low-density lipoprotein cholesterol; LVEF, left ventricular ejection fraction; LAD, left atrial diameter.

**Supplementary Table 3. Analysis of threshold effect between UAR and LAT/SEC.**

| <b>Outcome</b>                                           | <b>effect</b>     | <b>P</b> |
|----------------------------------------------------------|-------------------|----------|
| Model 1 Fitting model by standard linear regression      | 1.43 (1.25, 1.66) | <0.001   |
| Model 2 Fitting model by two-piecewise linear regression |                   |          |
| Inflection point                                         | 12.11             |          |
| <12.11                                                   | 1.61 (1.36, 1.92) | <0.001   |
| ≥12.11                                                   | 0.82 (0.51, 1.31) | 0.398    |
| <i>P</i> for likelihood test                             |                   | 0.015    |

Notes: adjusted for age, gender, BMI, smoking status, hypertension, DM, HF, CHD, stroke/TIA, paroxysmal AF, anticoagulants, antiplatelets, WBC, PLT, D-dimer, ALT, AST, creatinine, HDL-C, LDL-C, LAD, LVEF.

Abbreviations: UAR, uric acid-to-albumin ratio; LAT, left atrial thrombus; SEC, spontaneous echo contrast; DM, diabetes mellitus; HF, heart failure; CHD, coronary heart disease; TIA, transient ischemic attack; AF, atrial fibrillation; WBC, white blood cells; PLT, platelet count; ALT, alanine aminotransferase; AST, aspartate aminotransferase; HDL-C, high-density lipoprotein cholesterol; LDL-C, low-density lipoprotein cholesterol; LVEF, left ventricular ejection fraction; LAD, left atrial diameter.

**Supplementary Table 4. Predictive value of UAR, UA, and Albumin for LAT/SEC risk.**

| <b>Index</b> | <b>AUC (95% CI)</b>  | <b>Cut off</b> | <b>Accuracy (95% CI)</b> | <b>Sensitivity (95% CI)</b> | <b>Specificity (95% CI)</b> | <b>NPV (95% CI)</b>  | <b>PPV (95% CI)</b>  |
|--------------|----------------------|----------------|--------------------------|-----------------------------|-----------------------------|----------------------|----------------------|
| UAR          | 0.712 (0.654, 0.769) | 8.59           | 0.634 (0.592, 0.675)     | 0.742 (0.642, 0.821)        | 0.612 (0.565, 0.658)        | 0.919 (0.881, 0.945) | 0.286 (0.231, 0.347) |
| UA           | 0.684 (0.625, 0.742) | 360.50         | 0.617 (0.574, 0.658)     | 0.719 (0.618, 0.802)        | 0.595 (0.548, 0.641)        | 0.910 (0.871, 0.938) | 0.271 (0.218, 0.331) |
| Albumin      | 0.612 (0.549, 0.675) | 41.35          | 0.572 (0.529, 0.614)     | 0.629 (0.525, 0.722)        | 0.560 (0.512, 0.606)        | 0.878 (0.834, 0.912) | 0.230 (0.182, 0.287) |

Abbreviations: UAR, uric acid-to-albumin ratio; UA, uric acid; LAT, left atrial thrombus; SEC, spontaneous echo contrast; AUC, area under the curve; CI, confidence intervals; NPV, negative predictive value; PPV, positive predictive value.

**Supplementary Table 5. Comparison of different risk prediction models.**

| <b>Variables</b>                             | <b>C-index</b>       | <b>P-value</b> | <b>NRI (95% CI)</b>  | <b>P-value</b> | <b>IDI (95% CI)</b>  | <b>P-value</b> |
|----------------------------------------------|----------------------|----------------|----------------------|----------------|----------------------|----------------|
| CHA <sub>2</sub> DS <sub>2</sub> -VASc       | 0.708 (0.644, 0.771) | Ref            | Ref                  |                | Ref                  |                |
| UAR + CHA <sub>2</sub> DS <sub>2</sub> -VASc | 0.766 (0.712, 0.821) | 0.002          | 0.603 (0.371, 0.846) | <0.001         | 0.058 (0.026, 0.107) | 0.006          |

Abbreviations: UAR, uric acid-to-albumin ratio; C-index, Harrel's C-statistic; NRI, net reclassification index; IDI, integrated discrimination improvement.

**Supplementary Table 6. Mediating relationship between the UAR and LAT/SEC.**

| Mediators  | ADE                        |                | ACME                   |                | Proportion mediated |
|------------|----------------------------|----------------|------------------------|----------------|---------------------|
|            | Coefficients (95% CIs)     | <i>P</i> value | Coefficients (95% CIs) | <i>P</i> value |                     |
| WBC        | 0.00319 (0.00117, 0.01000) | <0.001         | 0.00003(-0.00004, 0)   | 0.450          | 0.00966             |
| Neutrophil | 0.00318 (0.00118, 0.01000) | <0.001         | -0.00000 (-0.00012, 0) | 0.940          | -0.00082            |
| Lymphocyte | 0.00343 (0.00128, 0.01000) | <0.001         | -0.00008(-0.00030, 0)  | 0.170          | -0.02287            |
| Monocyte   | 0.00330 (0.00116, 0.01000) | <0.001         | -0.00001(-0.00015, 0)  | 0.790          | -0.00409            |
| PLT        | 0.00325 (0.00116, 0.01000) | <0.001         | 0.00000(-0.00011, 0)   | 0.990          | 0.00003             |
| D-dimer    | 0.00325 (0.00116, 0.01000) | <0.001         | -0.00002 (-0.00022, 0) | 0.700          | -0.00496            |
| LAD        | 0.00287 (0.00109, 0.01000) | <0.001         | 0.00026 (0.00004, 0)   | 0.004          | 0.08263             |
| LVEF       | 0.00318 (0.00116, 0.01000) | <0.001         | 0.00034 (0.00005, 0)   | 0.004          | 0.09754             |
| LVEDD      | 0.00311 (0.00116, 0.01000) | <0.001         | 0.00016 (-0.00004, 0)  | 0.110          | 0.04838             |
| EDT        | 0.00325 (0.00119, 0.01000) | <0.001         | 0.00000 (-0.00007, 0)  | 0.920          | 0.00104             |

Notes: adjusted for age, gender, BMI, smoking status, hypertension, DM, HF, CHD, stroke/TIA, paroxysmal AF, anticoagulants, antiplatelets.

Abbreviations: ACME, average causal mediation effect; ADE, average direct effect; UAR, uric acid-to-albumin ratio; LAT, left atrial thrombus; SEC, spontaneous echo contrast; DM, diabetes mellitus; HF, heart failure; CHD, coronary heart disease; TIA, transient ischemic attack; AF, atrial fibrillation; WBC, white blood cells; PLT, platelet count; LVEF, left ventricular ejection fraction; LAD, left atrial diameter; LVEDD, left ventricular end-diastolic dimension; EDT, E wave deceleration time.

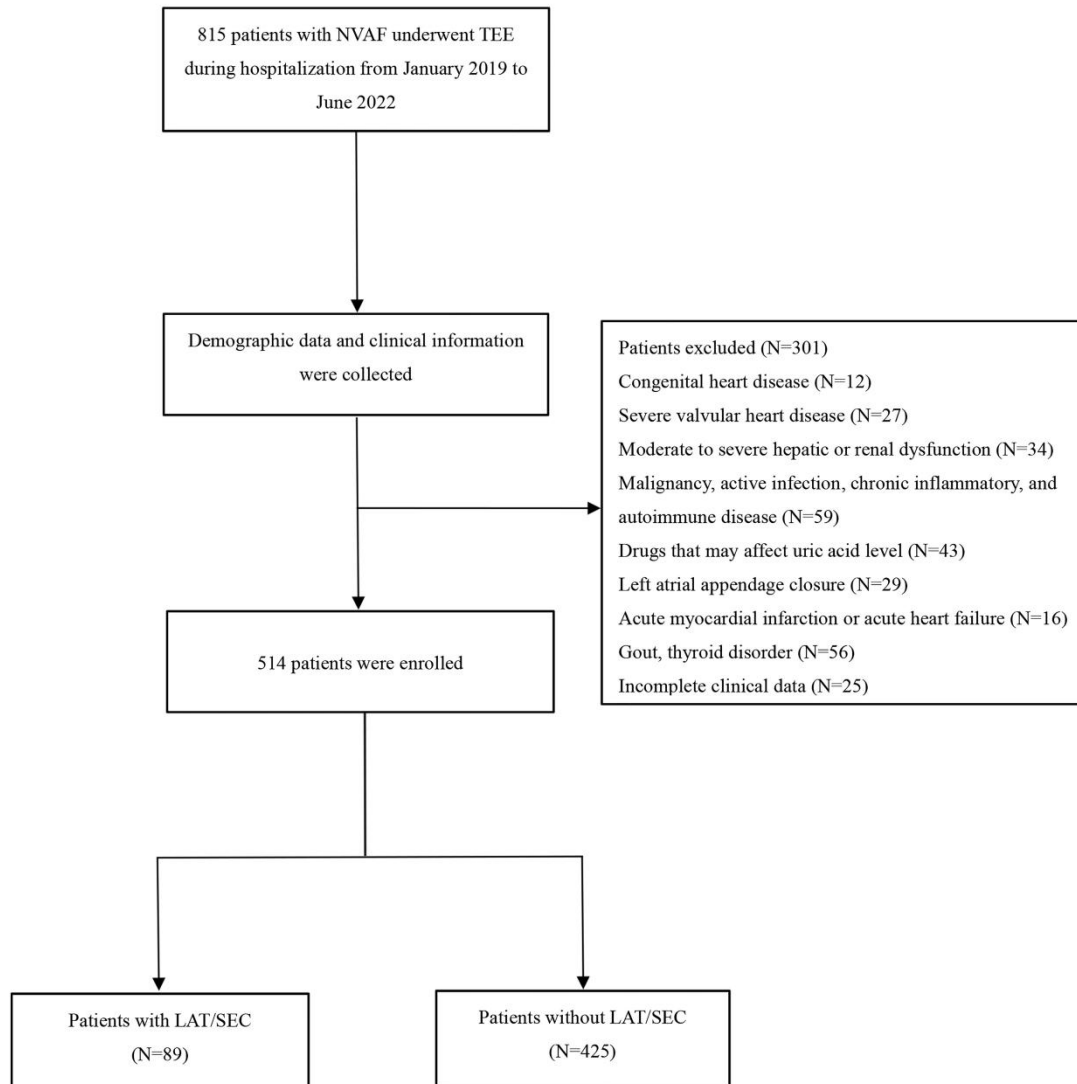

**Supplementary Figure 1:** Flow diagram for participants included in the study. Abbreviations: NVAF, non-valvular atrial fibrillation; TEE, transesophageal echocardiography; LAT/SEC, left atrial thrombus or spontaneous echo contrast.

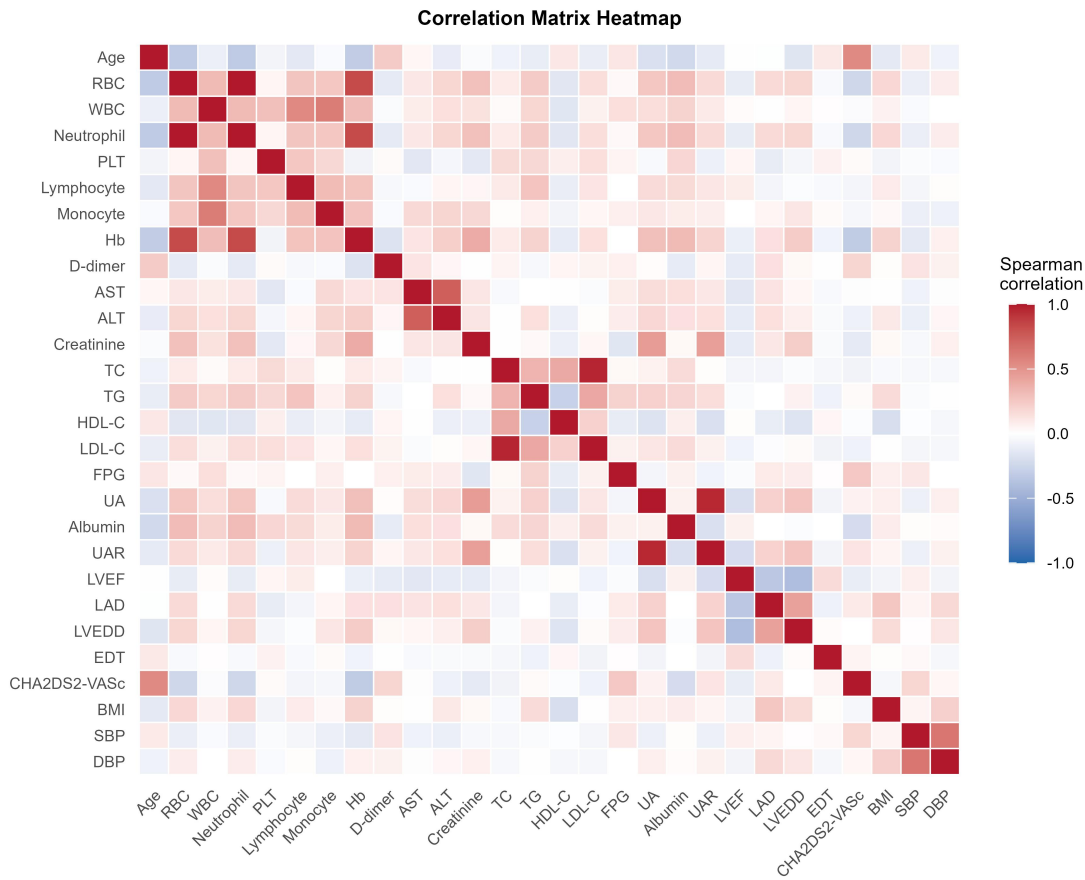

**Supplementary Figure 2:** Spearman correlation analysis of demographic characteristics, laboratory parameters, and cardiac structural indicators in NVAf patients. Abbreviations: RBC, red blood cells; WBC, white blood cells; PLT, platelet count; Hb, hemoglobin; AST, aspartate aminotransferase; ALT, alanine aminotransferase; TC, total cholesterol; TG, triglycerides; LDL-C, low-density lipoprotein cholesterol; HDL-C, high-density lipoprotein cholesterol; FPG, fasting plasma glucose; UA, uric acid; UAR, uric acid-to-albumin ratio; LAD, left atrial diameter; LVEF, left ventricular ejection fraction; LVEDD, left ventricular end-diastolic diameter; EDT, E-wave deceleration time; BMI, body mass index; SBP, systolic blood pressure; DBP, diastolic blood pressure.

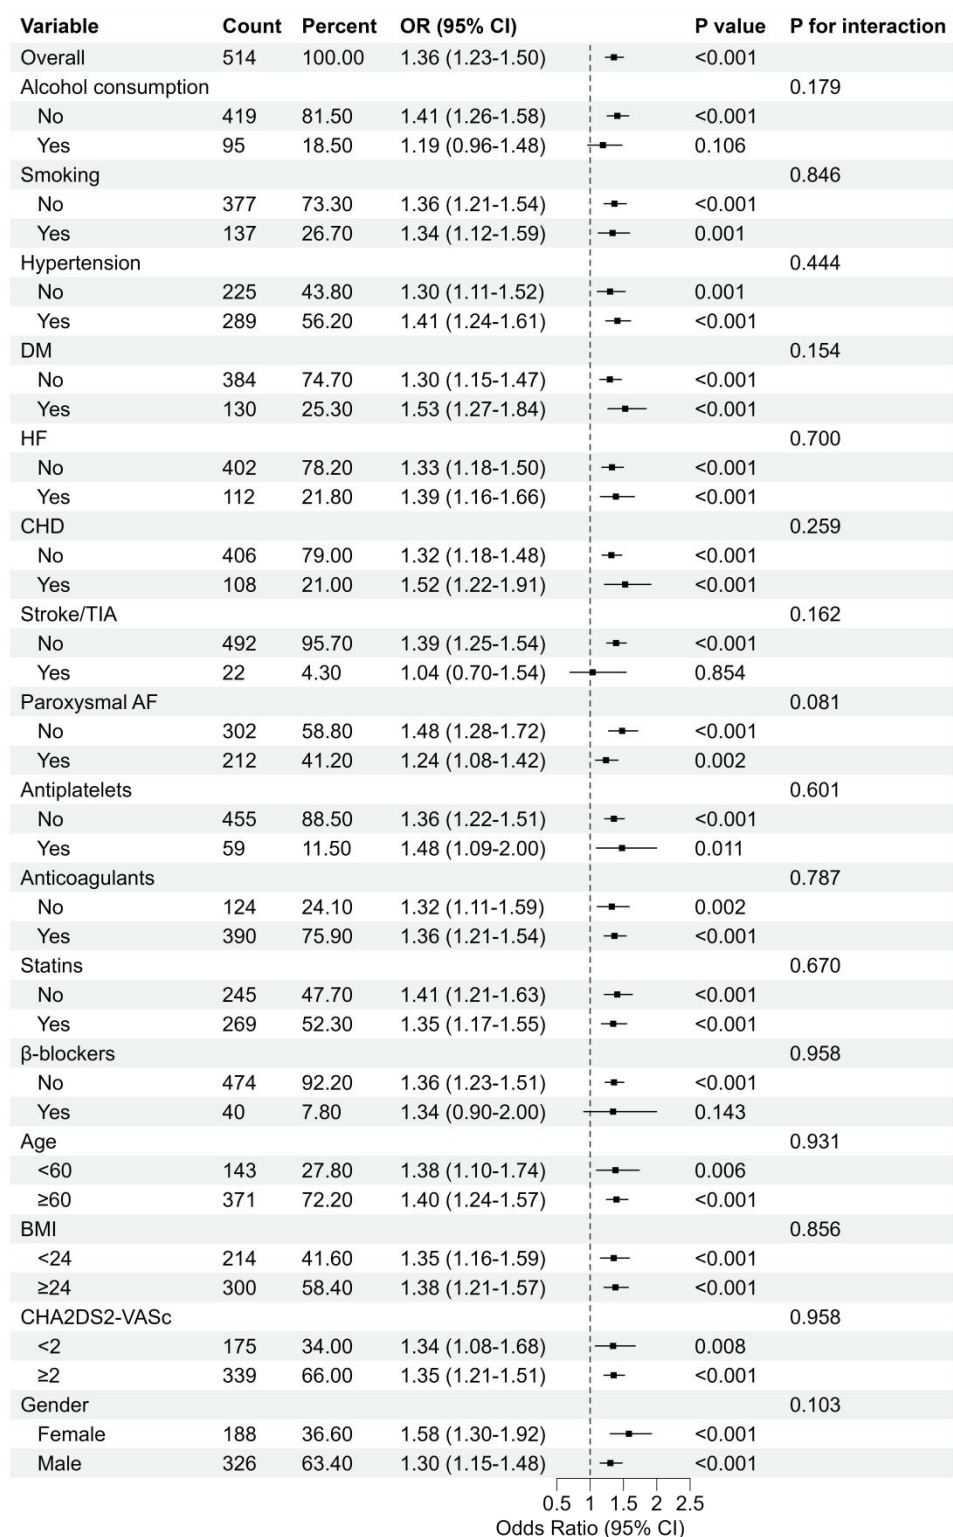

**Supplementary Figure 3:** Forest plot depicting subgroup analyses of the associations between UAR and LAT/SEC. Abbreviations: DM, diabetes mellitus; HF, heart failure; CHD, coronary heart disease; TIA, transient ischemic attack; AF, atrial fibrillation; BMI, body mass index.
